# Supplementary material for: Combining DL-Methionine and Bacillus thuringiensis Subspecies israelensis: Prospects for a Mosquito Larvicide
Source: MDPI journal article supplement (doi:10.3390/insects11120880), 2020-12-11
Supplement: s1 [file s1]

**Table S1.** Mortality of *Aedes aegypti* 2nd instar larvae when exposed to *Bacillus thuringiensis* subspecies *israelensis* (BTI; µg/L) for 48 hours in glass jars. Average mortality and standard errors calculated when three or more replicates were completed. Number of replicates, as well as jars and mosquitoes tested provided.

| Concentration<br>(µg/L) | Mortality | Standard<br>error | Replicates | Jars | Mosquitoes |
|-------------------------|-----------|-------------------|------------|------|------------|
| 0                       | 2.70      | 1.05              | 7          | 28   | 329        |
| 2.4                     | 19.75     | 4.86              | 6          | 24   | 263        |
| 4.8                     | 42.68     | 5.11              | 4          | 16   | 189        |
| 6                       | 97.50     | N/A               | 1          | 4    | 40         |
| 7.2                     | 58.50     | 6.71              | 4          | 16   | 190        |
| 9.6                     | 86.79     | 3.70              | 4          | 16   | 194        |
| 12                      | 95.12     | 2.17              | 7          | 28   | 329        |
| 24                      | 100.00    | N/A               | 1          | 4    | 45         |

**Table S2.** Mortality of *Anopheles quadrimaculatus* 3rd instar larvae when exposed to *Bacillus thuringiensis* subspecies *israelensis* (BTI; µg/L) for 48 hours in glass jars. Average mortality and standard errors calculated when three or more replicates were completed. Number of replicates, as well as jars and mosquitoes tested provided.

| Concentration<br>(µg/L) | Mortality | Standard<br>error | Replicates | Jars | Mosquitoes |
|-------------------------|-----------|-------------------|------------|------|------------|
| 0                       | 7.99      | 2.98              | 5          | 20   | 241        |
| 2.4                     | 0.00      | N/A               | 1          | 4    | 46         |
| 4.8                     | 0.00      | N/A               | 1          | 4    | 58         |
| 7.2                     | 2.08      | N/A               | 1          | 4    | 48         |
| 9.6                     | 8.70      | N/A               | 1          | 4    | 46         |
| 12                      | 26.80     | 7.36              | 5          | 20   | 253        |
| 24                      | 37.55     | 5.49              | 4          | 16   | 207        |
| 120                     | 40.00     | N/A               | 1          | 4    | 45         |
| 240                     | 62.29     | 6.87              | 4          | 16   | 202        |
| 1200                    | 100.00    | 0.00              | 3          | 12   | 154        |

**Table S3.** Mortality of *Aedes aegypti* 2nd instar larvae when exposed to DL-methionine (g/L) for 48 hours in glass jars. Average mortality and standard errors calculated. Number of replicates, as well as jars and mosquitoes tested provided.

| Concentration<br>(µg/L) | Mortality | Standard<br>error | Replicates | Jars | Mosquitoes |
|-------------------------|-----------|-------------------|------------|------|------------|
| 0                       | 3.09      | 1.29              | 4          | 16   | 201        |
| 1                       | 7.89      | 2.93              | 4          | 16   | 209        |
| 2.5                     | 32.05     | 6.23              | 4          | 16   | 198        |
| 5                       | 76.24     | 3.70              | 4          | 16   | 198        |
| 7.5                     | 91.82     | 1.41              | 4          | 16   | 195        |
| 10                      | 97.53     | 1.20              | 4          | 16   | 197        |

**Table S4.** Concentration response analysis of DL-methionine, *Bacillus thuringiensis* subspecies *israelensis* (BTI), and their combination on *Aedes aegypti* (n=6, 12 jars) exposed for 48 hours in glass jars (10 to 15 mosquitoes per jar). Average mortality (%) and standard errors provided.

| Active Ingredient                                     | Mortality (%) | Standard error |
|-------------------------------------------------------|---------------|----------------|
| Negative control (water)                              | 9.82          | 5.10           |
| <i>DL-methionine</i> (g/L)                            |               |                |
| 0.835                                                 | 12.40         | 6.67           |
| 1.670                                                 | 30.79         | 9.17           |
| 3.340                                                 | 60.10         | 11.10          |
| 6.680                                                 | 91.94         | 5.94           |
| 13.360                                                | 97.94         | 0.92           |
| <i>BTI</i> (µg/L)                                     |               |                |
| 1.2                                                   | 15.43         | 5.67           |
| 2.4                                                   | 44.18         | 9.76           |
| 4.8                                                   | 56.03         | 15.31          |
| 9.6                                                   | 87.25         | 6.21           |
| 19.2                                                  | 96.70         | 1.23           |
| <i>Combination MetBTI (times the LC<sub>50</sub>)</i> |               |                |
| 0.25X                                                 | 19.98         | 7.00           |
| 0.50X                                                 | 35.46         | 7.07           |
| 1.00x                                                 | 77.27         | 3.93           |
| 2.00x                                                 | 91.67         | 2.85           |
| 4.00x                                                 | 98.64         | 0.86           |

Units for concentration of the combination were X times the LC<sub>50</sub> for each active ingredient (see Table 2).

**Table S5.** Concentration response analysis of DL-methionine, *Bacillus thuringiensis* subspecies *israelensis* (BTI), and their combination on *Anopheles quadrimaculatus* (n=4, 12 jars) exposed for 48 hours in glass jars (10 to 15 mosquitoes per jar). Average mortality (%) and standard errors provided.

| Active Ingredient                                     | Mortality (%) | Standard error |
|-------------------------------------------------------|---------------|----------------|
| Negative control (water)                              | 14.24         | 5.56           |
| <i>DL-methionine</i> (g/L)                            |               |                |
| 0.2025                                                | 19.73         | 9.53           |
| 0.4050                                                | 30.30         | 4.29           |
| 0.8100                                                | 77.36         | 4.71           |
| 1.6200                                                | 93.68         | 1.57           |
| 3.2400                                                | 100.00        | 0.00           |
| <i>BTI</i> (µg/L)                                     |               |                |
| 21.875                                                | 12.84         | 1.10           |
| 43.750                                                | 22.94         | 4.23           |
| 87.500                                                | 39.32         | 5.09           |
| 175.000                                               | 41.35         | 9.34           |
| 350.000                                               | 76.06         | 13.95          |
| <i>Combination MetBTI (times the LC<sub>50</sub>)</i> |               |                |
| 0.25X                                                 | 17.81         | 4.13           |
| 0.50X                                                 | 43.88         | 9.72           |
| 1.00x                                                 | 83.56         | 8.61           |
| 2.00x                                                 | 94.82         | 2.84           |
| 4.00x                                                 | 100.00        | 0.00           |

Units for concentration of the combination were X times the LC<sub>50</sub> for each active ingredient (see Table 2).
